# Supplementary material for: A Fast Adsorption of Azithromycin on Waste-Product-Derived Graphene Oxide Induced by H-Bonding and Electrostatic Interactions
Source: PubMed Central journal article supplement — ACS Omega. 2022 Aug 22;7(34):29655–65. doi: 10.1021/acsomega.2c01919 (PMC9434760; doi:10.1021/acsomega.2c01919), 2022-08-22
Supplement: ao2c01919_si_001.pdf [file ao2c01919_si_001.pdf]

A Fast Adsorption of Azithromycin on Waste-Product-Derived Graphene Oxide Induced by H-Bonding and Electrostatic Interaction

Bushra Parvin Upoma<sup>1</sup>, Sabina Yasmin<sup>1\*</sup>, Md. Aftab Ali Shaikh<sup>1,3</sup>, Tajnin Jahan<sup>1</sup>, Md. Anamul Haque<sup>3</sup>  
Mohammad Moniruzzaman<sup>2</sup>, Md Humayun Kabir<sup>1,2\*</sup>

<sup>1</sup>Institute of National Analytical Research and Service (INARS), Bangladesh Council of Scientific and Industrial Research (BCSIR), Dhanmondi, Dhaka-1205, Bangladesh

<sup>2</sup>Central Analytical and Research Facilities (CARF), BCSIR, Dhaka-1205, Bangladesh

<sup>3</sup>Department of Chemistry, University of Dhaka, Dhaka-1000, Bangladesh

Corresponding author e-mail: [humayunkabir@bcsir.gov.bd](mailto:humayunkabir@bcsir.gov.bd)

Corresponding author e-mail: [sabinayasmin@bcsir.gov.bd](mailto:sabinayasmin@bcsir.gov.bd)

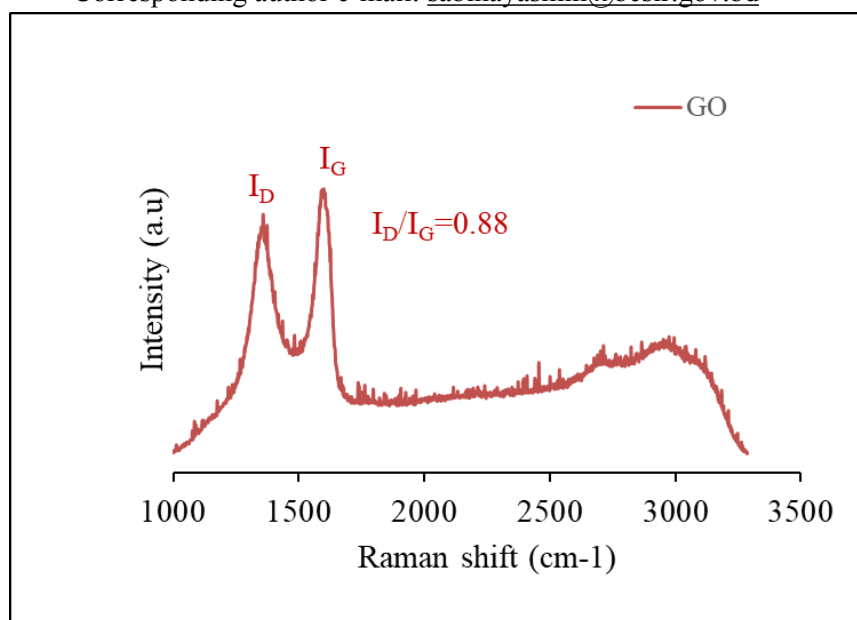

Figure. S1. Raman spectra and  $I_D/I_G$  ratio of GO
